# Supplementary material for: Analysis of Microbiota Persistence in Quebec’s Terroir Cheese Using a Metabarcoding Approach
Source: MDPI journal article supplement (doi:10.3390/microorganisms10071381), 2022-07-09
Supplement: s1 [file s1]

**Table S1. Cheese samples description and biostatistics describing cheese microflora.** The richness (estimated OTUs) has been calculated with the Chao1 index, the alpha-diversity is evaluated with the inverse of Simpson index and the beta-diversity is evaluated for the same sample, at different year using Bray-Curtis dissimilarity index

| ID     | Cheese    |         | Milk heat treatment | Cheese type | Bacteria |          |                     |                    | Fungi |          |                     |                    |
|--------|-----------|---------|---------------------|-------------|----------|----------|---------------------|--------------------|-------|----------|---------------------|--------------------|
|        | Rind type | Section |                     |             | Sobs     | Richness | $\alpha$ -diversity | $\beta$ -diversity | Sobs  | Richness | $\alpha$ -diversity | $\beta$ -diversity |
| c01y15 | Bloomy    | core    | Pasteurized         | Soft        | 13       | 13.6     | 1.004               | 0.045              | 13    | 15.0     | 1.034               | 0.238              |
| c01y18 | Bloomy    | core    | Pasteurized         | Soft        | 5        | 6.0      | 1.006               | 0.045              | 13    | 13.0     | 1.263               | 0.238              |
| c02y15 | Bloomy    | core    | Pasteurized         | Soft        | 8        | 9.0      | 1.758               | 0.052              | 21    | 21.0     | 3.010               | 0.417              |
| c02y18 | Bloomy    | core    | Pasteurized         | Soft        | 14       | 19.0     | 1.901               | 0.052              | 19    | 20.0     | 1.457               | 0.417              |
| c03y15 | Bloomy    | core    | Pasteurized         | Soft        | 4        | 4.0      | 1.358               | 0.118              | 25    | 28.0     | 2.877               | 0.434              |
| c03y18 | Bloomy    | core    | Pasteurized         | Soft        | 5        | 8.0      | 1.439               | 0.118              | 24    | 30.0     | 1.834               | 0.434              |
| c04y15 | Bloomy    | core    | Raw                 | Soft        | 10       | 10.3     | 1.011               | 0.069              | 17    | 17.8     | 1.749               | 0.286              |
| c04y18 | Bloomy    | core    | Raw                 | Soft        | 15       | 20.0     | 1.010               | 0.069              | 14    | 20.0     | 1.221               | 0.286              |
| c06y15 | Bloomy    | core    | Thermized           | Soft        | 13       | 14.0     | 2.075               | 0.170              | 26    | 32.0     | 3.841               | 0.585              |
| c06y18 | Bloomy    | core    | Thermized           | Soft        | 17       | 20.0     | 2.223               | 0.170              | 26    | 26.5     | 1.202               | 0.585              |
| c18y15 | Bloomy    | core    | Pasteurized         | Semi-hard   | 11       | 11.3     | 1.016               | -                  | 23    | 30.5     | 2.179               | -                  |
| c19y15 | Bloomy    | core    | Raw                 | Semi-hard   | 16       | 17.0     | 2.000               | -                  | 22    | 22.0     | 2.166               | -                  |
| c20y15 | Bloomy    | core    | Pasteurized         | Soft        | 23       | 25.5     | 1.014               | -                  | 24    | 25.5     | 1.491               | -                  |
| c21y15 | Bloomy    | core    | Pasteurized         | Soft        | 7        | 8.5      | 1.202               | -                  | 20    | 20.0     | 3.019               | -                  |
| c22y15 | Bloomy    | core    | Pasteurized         | Soft        | 15       | 51.0     | 1.383               | -                  | 25    | 26.5     | 1.403               | -                  |
| c23y15 | Bloomy    | core    | Raw                 | Soft        | 14       | 14.0     | 2.553               | -                  | 25    | 28.0     | 2.567               | -                  |
| c07y15 | Natural   | core    | Thermized           | Semi-hard   | 13       | 23.0     | 2.191               | 0.145              | 17    | 17.0     | 1.298               | 0.431              |
| c07y18 | Natural   | core    | Thermized           | Semi-hard   | 10       | 10.0     | 2.035               | 0.145              | 16    | 17.0     | 1.983               | 0.431              |
| c08y15 | Natural   | core    | Thermized           | Semi-hard   | 10       | 10.5     | 2.040               | 0.269              | 19    | 20.0     | 3.055               | 0.691              |
| c08y18 | Natural   | core    | Thermized           | Semi-hard   | 14       | 14.6     | 1.434               | 0.269              | 21    | 22.0     | 1.519               | 0.691              |
| c24y18 | Natural   | core    | Raw                 | Hard        | 20       | 24.2     | 1.217               | -                  | 27    | 27.3     | 3.398               | -                  |
| c09y15 | Washed    | core    | Thermized           | Hard        | 15       | 20.0     | 1.025               | 0.031              | 24    | 24.0     | 2.220               | 0.540              |
| c09y18 | Washed    | core    | Thermized           | Hard        | 11       | 13.0     | 1.039               | 0.031              | 22    | 22.0     | 4.651               | 0.540              |
| c10y15 | Washed    | core    | Pasteurized         | Soft        | 14       | 14.8     | 1.926               | 0.052              | 21    | 21.0     | 2.145               | 0.100              |
| c10y18 | Washed    | core    | Pasteurized         | Soft        | 16       | 21.0     | 2.039               | 0.052              | 28    | 28.0     | 2.120               | 0.100              |
| c11y15 | Washed    | core    | Pasteurized         | Semi-hard   | 19       | 20.2     | 1.154               | 0.258              | 18    | 19.0     | 2.119               | 0.199              |
| c11y18 | Washed    | core    | Pasteurized         | Semi-hard   | 16       | 16.0     | 1.485               | 0.258              | 34    | 40.0     | 1.665               | 0.199              |
| c12y15 | Washed    | core    | Thermized           | Semi-hard   | 20       | 30.0     | 1.072               | 0.643              | 24    | 24.5     | 1.269               | 0.457              |
| c12y18 | Washed    | core    | Thermized           | Semi-hard   | 15       | 15.5     | 2.310               | 0.643              | 28    | 28.3     | 2.414               | 0.457              |
| c13y15 | Washed    | core    | Pasteurized         | Semi-hard   | 10       | 13.0     | 2.703               | 0.693              | 17    | 17.0     | 2.152               | 0.908              |
| c13y18 | Washed    | core    | Pasteurized         | Semi-hard   | 23       | 25.0     | 1.066               | 0.693              | 22    | 32.0     | 1.380               | 0.908              |
| c14y15 | Washed    | core    | Thermized           | Hard        | 9        | 10.5     | 2.305               | 0.281              | 18    | 18.0     | 3.312               | 0.557              |
| c14y18 | Washed    | core    | Thermized           | Hard        | 7        | 8.0      | 1.504               | 0.281              | 22    | 22.8     | 2.319               | 0.557              |
| c15y15 | Washed    | core    | Pasteurized         | Semi-hard   | 15       | 18.0     | 1.024               | 0.234              | 13    | 13.0     | 1.496               | 0.273              |
| c15y18 | Washed    | core    | Pasteurized         | Semi-hard   | 20       | 30.0     | 1.203               | 0.234              | 33    | 33.3     | 2.445               | 0.273              |
| c16y15 | Washed    | core    | Pasteurized         | Semi-hard   | 19       | 37.0     | 1.873               | 0.307              | 29    | 29.0     | 3.231               | 0.772              |
| c16y18 | Washed    | core    | Pasteurized         | Semi-hard   | 10       | 10.0     | 2.095               | 0.307              | 18    | 21.0     | 1.301               | 0.772              |
| c25y15 | Washed    | core    | Raw                 | Hard        | 13       | 15.0     | 1.973               | -                  | 24    | 25.0     | 2.926               | -                  |
| c26y15 | Washed    | core    | Pasteurized         | Semi-hard   | 13       | 20.5     | 1.018               | -                  | 20    | 21.0     | 2.578               | -                  |
| c27y15 | Washed    | core    | Thermized           | Semi-hard   | 10       | 11.0     | 2.254               | -                  | 27    | 30.3     | 3.085               | -                  |
| c28y15 | Washed    | core    | Raw                 | Semi-hard   | 24       | 31.0     | 2.056               | -                  | 18    | 18.5     | 1.657               | -                  |
| c29y15 | Washed    | core    | Raw                 | Hard        | 22       | 27.3     | 1.869               | -                  | 19    | 22.0     | 1.505               | -                  |
| c30y15 | Washed    | core    | Thermized           | Semi-hard   | 20       | 23.0     | 2.290               | -                  | 15    | 15.0     | 3.087               | -                  |
| c31y18 | Washed    | core    | Pasteurized         | Soft        | 39       | 39.0     | 4.157               | -                  | 18    | 21.0     | 2.025               | -                  |
| c32y18 | Washed    | core    | Thermized           | Semi-hard   | 22       | 29.5     | 1.759               | -                  | 23    | 23.0     | 2.974               | -                  |
| c33y18 | Washed    | core    | Thermized           | Semi-hard   | 36       | 102.0    | 1.026               | -                  | 21    | 21.0     | 2.823               | -                  |
| c34y18 | Washed    | core    | Thermized           | Hard        | 21       | 28.0     | 2.430               | -                  | 24    | 29.0     | 0.518               | -                  |

|        |         |      |             |           |         |        |       |   |         |       |       |
|--------|---------|------|-------------|-----------|---------|--------|-------|---|---------|-------|-------|
| r01y15 | Bloomy  | rind | Pasteurized | Soft      | -       | -      | -     | - | 9 9.0   | 1.003 | 0.461 |
| r01y18 | Bloomy  | rind | Pasteurized | Soft      | 48 49.0 | 2.809  | -     | - | 20 20.5 | 2.152 | 0.461 |
| r02y15 | Bloomy  | rind | Pasteurized | Soft      | 24 29.0 | 2.163  | 0.228 | - | 15 15.3 | 1.540 | 0.268 |
| r02y18 | Bloomy  | rind | Pasteurized | Soft      | 34 36.0 | 2.964  | 0.228 | - | 12 12.0 | 1.123 | 0.268 |
| r03y15 | Bloomy  | rind | Pasteurized | Soft      | 26 27.0 | 1.392  | 0.510 | - | 19 20.0 | 2.264 | 0.149 |
| r03y18 | Bloomy  | rind | Pasteurized | Soft      | 44 44.3 | 4.059  | 0.510 | - | 14 14.0 | 2.015 | 0.149 |
| r04y15 | Bloomy  | rind | Raw         | Soft      | 23 24.5 | 1.252  | 0.110 | - | 15 18.0 | 1.984 | 0.476 |
| r04y18 | Bloomy  | rind | Raw         | Soft      | 25 26.4 | 1.063  | 0.110 | - | 7 7.0   | 1.005 | 0.476 |
| r06y15 | Bloomy  | rind | Thermized   | Soft      | 24 24.2 | 2.468  | 0.769 | - | 19 19.5 | 2.470 | 0.625 |
| r06y18 | Bloomy  | rind | Thermized   | Soft      | 30 31.5 | 4.129  | 0.769 | - | 13 13.3 | 1.274 | 0.625 |
| r18y15 | Bloomy  | rind | Pasteurized | Semi-hard | 27 34.5 | 2.273  | -     | - | 18 21.0 | 2.454 | -     |
| r19y15 | Bloomy  | rind | Raw         | Semi-hard | 31 31.5 | 5.476  | -     | - | 19 19.0 | 1.579 | -     |
| r20y15 | Bloomy  | rind | Pasteurized | Soft      | 30 30.8 | 7.184  | -     | - | 22 50.0 | 2.154 | -     |
| r21y15 | Bloomy  | rind | Pasteurized | Soft      | 16 17.0 | 1.630  | -     | - | 22 25.3 | 1.551 | -     |
| r22y15 | Bloomy  | rind | Pasteurized | Soft      | 26 31.0 | 2.682  | -     | - | 12 12.0 | 1.438 | -     |
| r23y15 | Bloomy  | rind | Raw         | Soft      | 36 39.0 | 3.845  | -     | - | 22 22.3 | 1.908 | -     |
| r07y15 | Natural | rind | Thermized   | Semi-hard | 22 25.3 | 2.808  | 0.243 | - | 11 14.0 | 1.444 | 0.237 |
| r07y18 | Natural | rind | Thermized   | Semi-hard | 16 22.0 | 2.363  | 0.243 | - | 10 10.5 | 1.235 | 0.237 |
| r08y15 | Natural | rind | Thermized   | Semi-hard | 25 28.3 | 2.324  | 0.431 | - | 17 17.0 | 1.737 | 0.531 |
| r08y18 | Natural | rind | Thermized   | Semi-hard | 30 33.8 | 3.067  | 0.431 | - | 14 14.5 | 1.736 | 0.531 |
| r24y18 | Natural | rind | Raw         | Hard      | 34 62.0 | 3.095  | -     | - | 26 36.0 | 4.042 | -     |
| r09y15 | Washed  | rind | Thermized   | Hard      | 31 31.0 | 7.282  | 0.501 | - | 16 16.5 | 2.807 | 0.537 |
| r09y18 | Washed  | rind | Thermized   | Hard      | 34 36.5 | 2.817  | 0.501 | - | 19 19.5 | 2.886 | 0.537 |
| r10y15 | Washed  | rind | Pasteurized | Soft      | 21 22.0 | 4.140  | 0.391 | - | 16 16.0 | 1.745 | 0.148 |
| r10y18 | Washed  | rind | Pasteurized | Soft      | 24 25.0 | 1.996  | 0.391 | - | 14 14.0 | 1.950 | 0.148 |
| r11y15 | Washed  | rind | Pasteurized | Semi-hard | 34 34.8 | 4.412  | 0.404 | - | 14 15.0 | 2.300 | 0.384 |
| r11y18 | Washed  | rind | Pasteurized | Semi-hard | 35 40.0 | 3.059  | 0.404 | - | 21 22.0 | 2.170 | 0.384 |
| r12y15 | Washed  | rind | Thermized   | Semi-hard | 26 26.0 | 4.446  | 0.958 | - | 17 17.5 | 1.557 | 0.300 |
| r12y18 | Washed  | rind | Thermized   | Semi-hard | 34 37.3 | 4.377  | 0.958 | - | 26 26.0 | 1.402 | 0.300 |
| r13y15 | Washed  | rind | Pasteurized | Semi-hard | 24 24.8 | 5.957  | 0.952 | - | 11 11.0 | 1.381 | 0.118 |
| r13y18 | Washed  | rind | Pasteurized | Semi-hard | 29 29.0 | 5.429  | 0.952 | - | 11 11.0 | 1.364 | 0.118 |
| r14y15 | Washed  | rind | Thermized   | Hard      | 33 33.5 | 5.096  | 0.741 | - | 10 10.0 | 1.277 | 0.579 |
| r14y18 | Washed  | rind | Thermized   | Hard      | 25 25.8 | 2.237  | 0.741 | - | 23 24.5 | 3.870 | 0.579 |
| r15y15 | Washed  | rind | Pasteurized | Semi-hard | -       | -      | -     | - | 14 17.0 | 1.740 | 0.320 |
| r15y18 | Washed  | rind | Pasteurized | Semi-hard | 32 34.5 | 6.207  | -     | - | 13 14.5 | 1.353 | 0.320 |
| r16y15 | Washed  | rind | Pasteurized | Semi-hard | 34 44.0 | 4.860  | 0.573 | - | 11 14.0 | 1.499 | 0.706 |
| r16y18 | Washed  | rind | Pasteurized | Semi-hard | 42 45.3 | 3.301  | 0.573 | - | 24 24.0 | 1.911 | 0.706 |
| r25y15 | Washed  | rind | Raw         | Hard      | 32 33.5 | 4.386  | -     | - | 19 19.0 | 3.909 | -     |
| r26y15 | Washed  | rind | Pasteurized | Semi-hard | 31 41.0 | 6.653  | -     | - | 13 13.0 | 2.545 | -     |
| r27y15 | Washed  | rind | Thermized   | Semi-hard | 39 40.7 | 8.269  | -     | - | 17 23.0 | 1.184 | -     |
| r28y15 | Washed  | rind | Raw         | Semi-hard | 38 48.0 | 10.969 | -     | - | 12 12.0 | 1.453 | -     |
| r29y15 | Washed  | rind | Raw         | Hard      | 40 54.0 | 6.693  | -     | - | 21 22.5 | 1.844 | -     |
| r30y15 | Washed  | rind | Thermized   | Semi-hard | 38 41.3 | 4.450  | -     | - | 10 10.5 | 1.534 | -     |
| r31y18 | Washed  | rind | Pasteurized | Soft      | 16 16.0 | 1.290  | -     | - | 15 15.0 | 1.219 | -     |
| r32y18 | Washed  | rind | Thermized   | Semi-hard | 44 46.5 | 8.732  | -     | - | 11 11.5 | 2.066 | -     |
| r33y18 | Washed  | rind | Thermized   | Semi-hard | 33 33.0 | 4.953  | -     | - | 11 12.0 | 2.337 | -     |
| r34y18 | Washed  | rind | Thermized   | Hard      | 41 59.0 | 4.121  | -     | - | 20 30.0 | 2.025 | -     |
