# Supplementary material for: Analysis of Microbiota Persistence in Quebec’s Terroir Cheese Using a Metabarcoding Approach
Source: MDPI journal article supplement (doi:10.3390/microorganisms10071381), 2022-07-09
Supplement: s1 [file s1]

**Table S2. Primers sequences for the preparation of the samples.** Name of primers or adapters, target, DNA region and sequences.

| Primers/adapters | Target   | Region | Sequences                          |
|------------------|----------|--------|------------------------------------|
| 347F (a)         | Bacteria | V3-V4  | GGAGGCAGCAGTRRGGAAT                |
| 803R (a)         | Bacteria | V3-V4  | CTACCRGGGTATCTAATCC                |
| 341F (b)         | Bacteria | V3-V4  | CCTACGGGNGGCWGCAG                  |
| 805R (b)         | Bacteria | V3-V4  | GACTACHVGGGTATCTAATCC              |
| 969F             | Bacteria | V6-V8  | ACGCGHNRAACCTTACC                  |
| 1406R            | Bacteria | V6-V8  | ACGGGCRGTGWGTRCAA                  |
| ITS1Fngs         | Fungi    | ITS1   | GGTCATTTAGAGGAAGTAA                |
| ITS2             | Fungi    | ITS1   | GCTGCGTTCTTCATCGATGC               |
| ITS3tagmix1      | Fungi    | ITS2   | TAGACTCGTCATCGATGAAGAACGCAG        |
| ITS3tagmix2      | Fungi    | ITS2   | TAGACTCGTCAACGATGAAGAACGCAG        |
| ITS3tagmix3      | Fungi    | ITS2   | TAGACTCGTCACCGATGAAGAACGCAG        |
| ITS3tagmix4      | Fungi    | ITS2   | TAGACTCGTCATCGATGAAGAACGTAG        |
| ITS3tagmix5      | Fungi    | ITS2   | TAGACTCGTCATCGATGAAGAACGTGG        |
| ITS4ngs          | Fungi    | ITS2   | TTCCTSCGCTTATTGATATGC              |
| Forward adapter  | -        | -      | ACACTCTTTCCCTACACGACGCTCTTCCGATCT  |
| Reverse adapter  | -        | -      | GTGACTGGAGTTCAGACGTGTGCTCTTCCGATCT |

(a) Primers used in 2015; (b) Primers used in 2018.
